# Supplementary material for: Identification of SYS1 as a Host Factor Required for Shiga Toxin-Mediated Cytotoxicity in Vero Cells
Source: MDPI journal article supplement (doi:10.3390/ijms22094936), 2021-05-06
Supplement: s1 [file s1]

## A Genome

Parent  
 exon | intron  
 ctctccatgatgtccttcaccccaacgcctcaccctgggtgagtatcaccagtttggtta (WT)

$\Delta$ SYS1#1  
 ctctccatgatgtccttcaccccaacgcctcaccctgggtgagtatcaccagtttggtta ( $\Delta$ 8)  
 ctctccatgatgtccttcaccccaacgcctcaccctgggtgagtatcaccagtttggtta ( $\Delta$ 11)

$\Delta$ SYS1#2  
 ctctccatgatgtccttcaccccaacgcctcaccctgggtgagtatcaccagtttggtta ( $\Delta$ 5)

$\Delta$ SYS1#3  
 ctctccatgatgtccttcaccccaacgcctcaccctgggtgagtatcaccagtttggtta ( $\Delta$ 14)  
 ctctccaacgcctcaccctgggtgagtatcaccagtttggtta ( $\Delta$ 52)

## B RNA

Parent  
 exon3 | exon4  
 ctctccatgatgtccttcaccccaacgcctcaccctgggtgagtatcaccagtttggtta (WT)  
 L S M M S F I L N A L T C A L G L L Y F I

$\Delta$ SYS1#1  
 ctctccatgatgtccttcaccccaacgcctcaccctgggtgagtatcaccagtttggtta ( $\Delta$ 11)  
 L S M M S F I L N C P G L A V L H  
 frameshift  
 75 irrelevant aa & STOP codon

$\Delta$ SYS1#2  
 ctctccatgatgtccttcaccccaacgcctcaccctgggtgagtatcaccagtttggtta ( $\Delta$ 5)  
 L S M M S F I L N A L C P G L A V L H  
 frameshift  
 75 irrelevant aa & STOP codon

$\Delta$ SYS1#1, 2 & 3  
 exon2 | exon4  
 cgaagcagccctcgctggaccagatgttcgacgccgagtgccctgggtgagtatcaccagtttggtta ( $\Delta$ ex3)  
 R S S P S L D Q M F D A E C P G L A V L H ( $\Delta$ 68)  
 frameshift  
 75 irrelevant aa & STOP codon

SYS1 gRNA-resistant cDNA  
 ctctccatgatgtccttcaccccaacgcctcaccctgggtgagtatcaccagtttggtta (Silent mutations)  
 L S M M S F I L N A L T C A L G L L Y F I

**Figure S1. SYS1 genome and transcript sequences in  $\Delta$ SYS1 cell clones**

(A) Genome sequences. An arrow indicates the sgRNA-targeted sequence. Red letters in sequences are indicative of deletion mutations, which caused frameshifts shown at the right side of the sequences. Boxes indicate protospacer adjacent motif (PAM) sequences.

(B) Transcript sequences. RT-PCR fragments amplified using a pair of primers (s1 and as), shown in Figure 3C, were sequenced. Red letters in RNA sequences are indicative of deletion mutations, which caused frameshifts shown at the right side of the sequences. Frameshifted amino acid sequences are shown in red letters. Related to Figure 3.

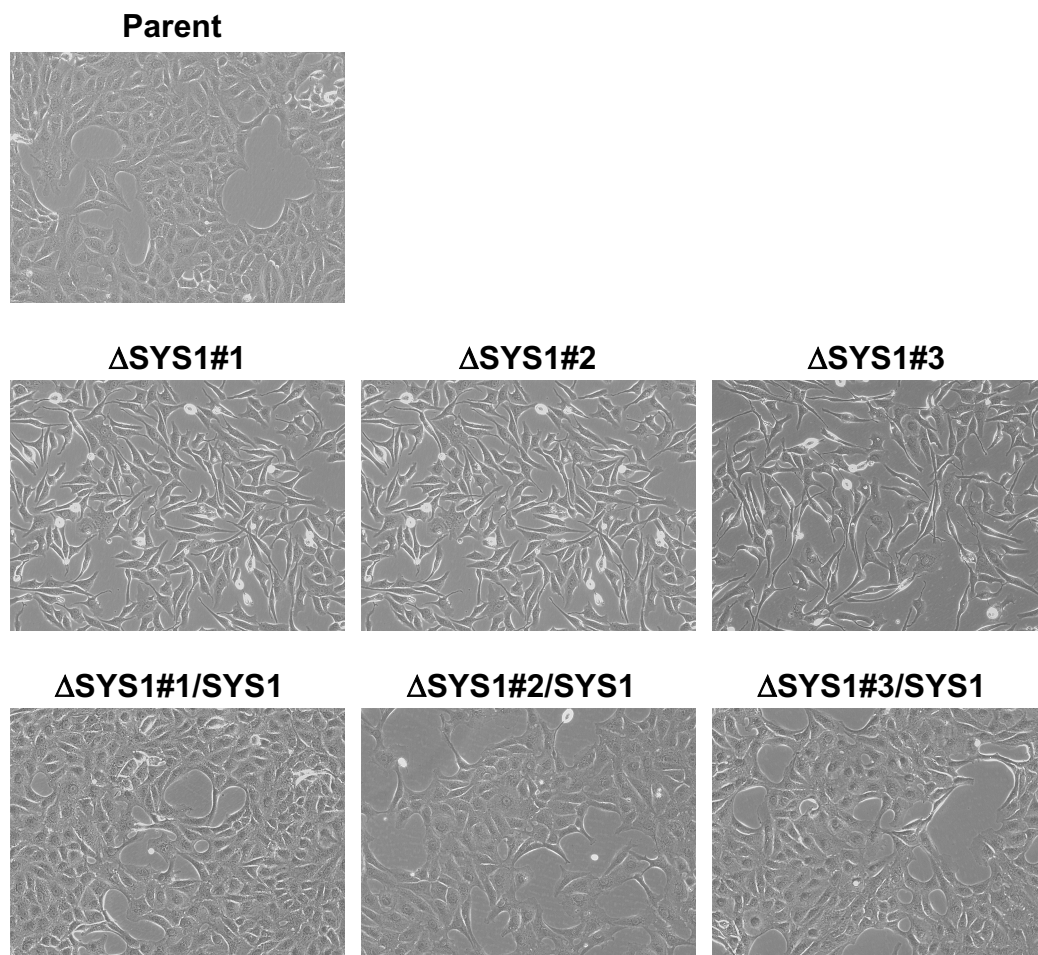

**Figure S2. Cellular morphological changes in  $\Delta$ SYS1 cell clones**  
Related to Figure 3.

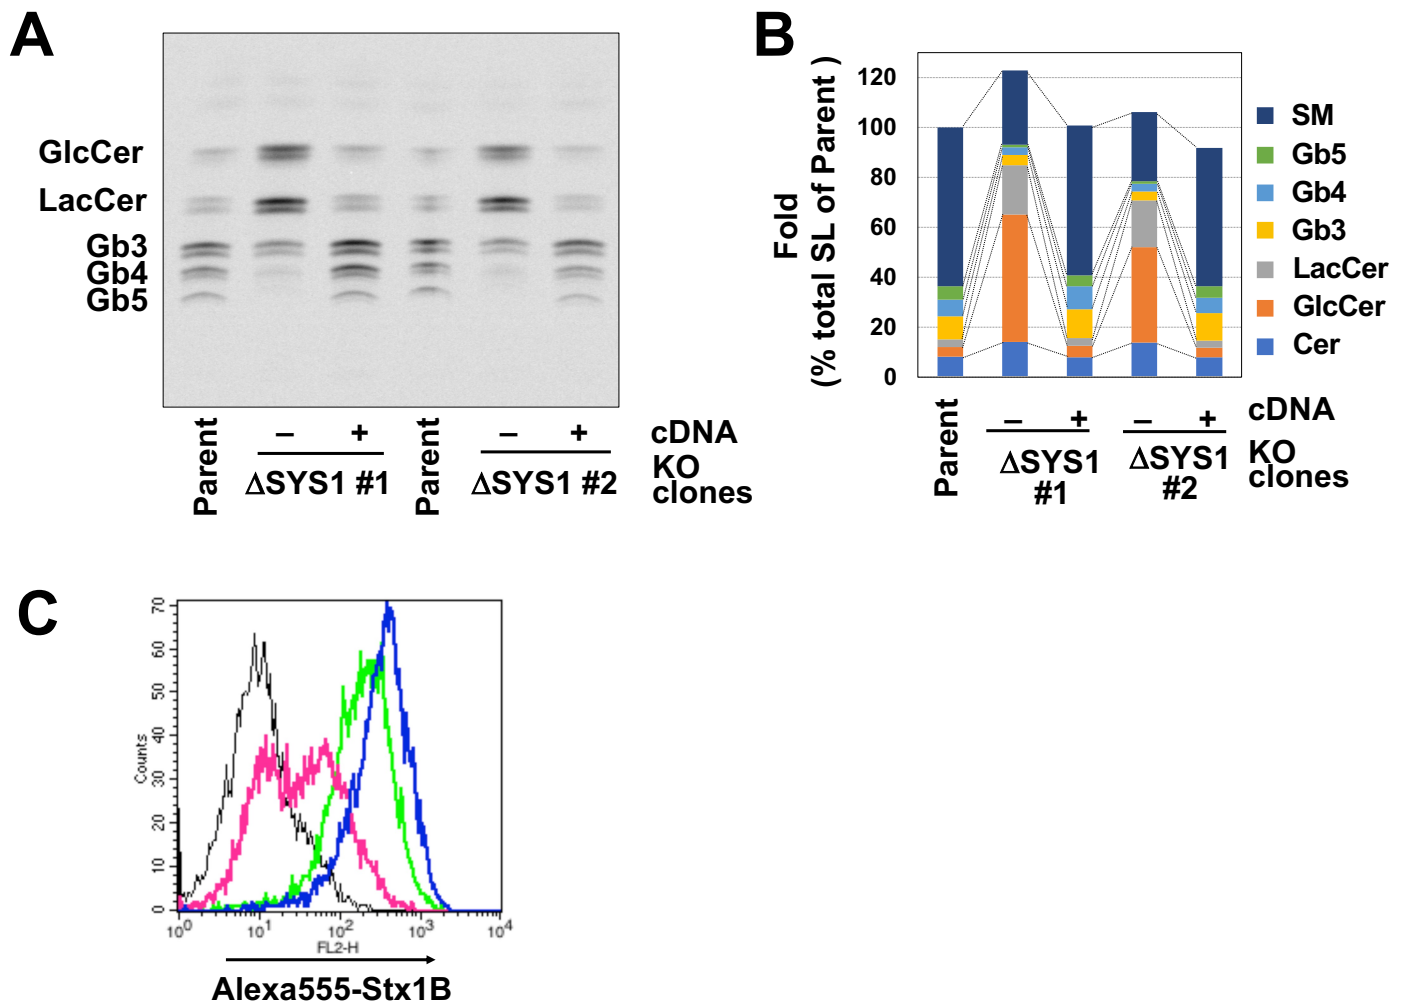

**Figure S3. GSL defects in  $\Delta$ SYS1 cells**

(A) GSL metabolic analysis of  $\Delta$ SYS1 cells and  $\Delta$ SYS1/SYS1 cells. Cells were labeled with [ $^{14}$ C]galactose, and labeled lipids were separated on a TLC plate. Related to Figure 4.

(B) Quantification of labeling experiments shown in Figure 4B. The relative amount of [ $^{14}$ C]serine-labeled lipid is expressed as a percentage of band intensity derived from total sphingolipids in parent cells and is representative of the mean percentage from three independent experiments. Related to Figure 4.

(C) Surface binding of STx on  $\Delta$ SYS1/SYS1-HA cells. Cells were stained with (green, magenta, and blue lines) or without (black line) Alexa555-labeled STx1 B subunit (Alexa555-STx1 B) and analyzed using FACS. Green lines indicate staining in parent cells. Black and magenta lines indicate staining in  $\Delta$ SYS1 cells. Blue lines indicate staining in  $\Delta$ SYS1/SYS1-HA cells. It should be noted that HA tagging at the C-terminus did not affect SYS1 functions of GSL regulation. Related to Figure 5.
